# Supplementary material
Source: PubMed Central journal article supplement (PMC7681911)
Supplement: NIHMS1643619-supplement-Figure_S1.pdf [file NIHMS1643619-supplement-Figure_S1.pdf]

**Figure S1**

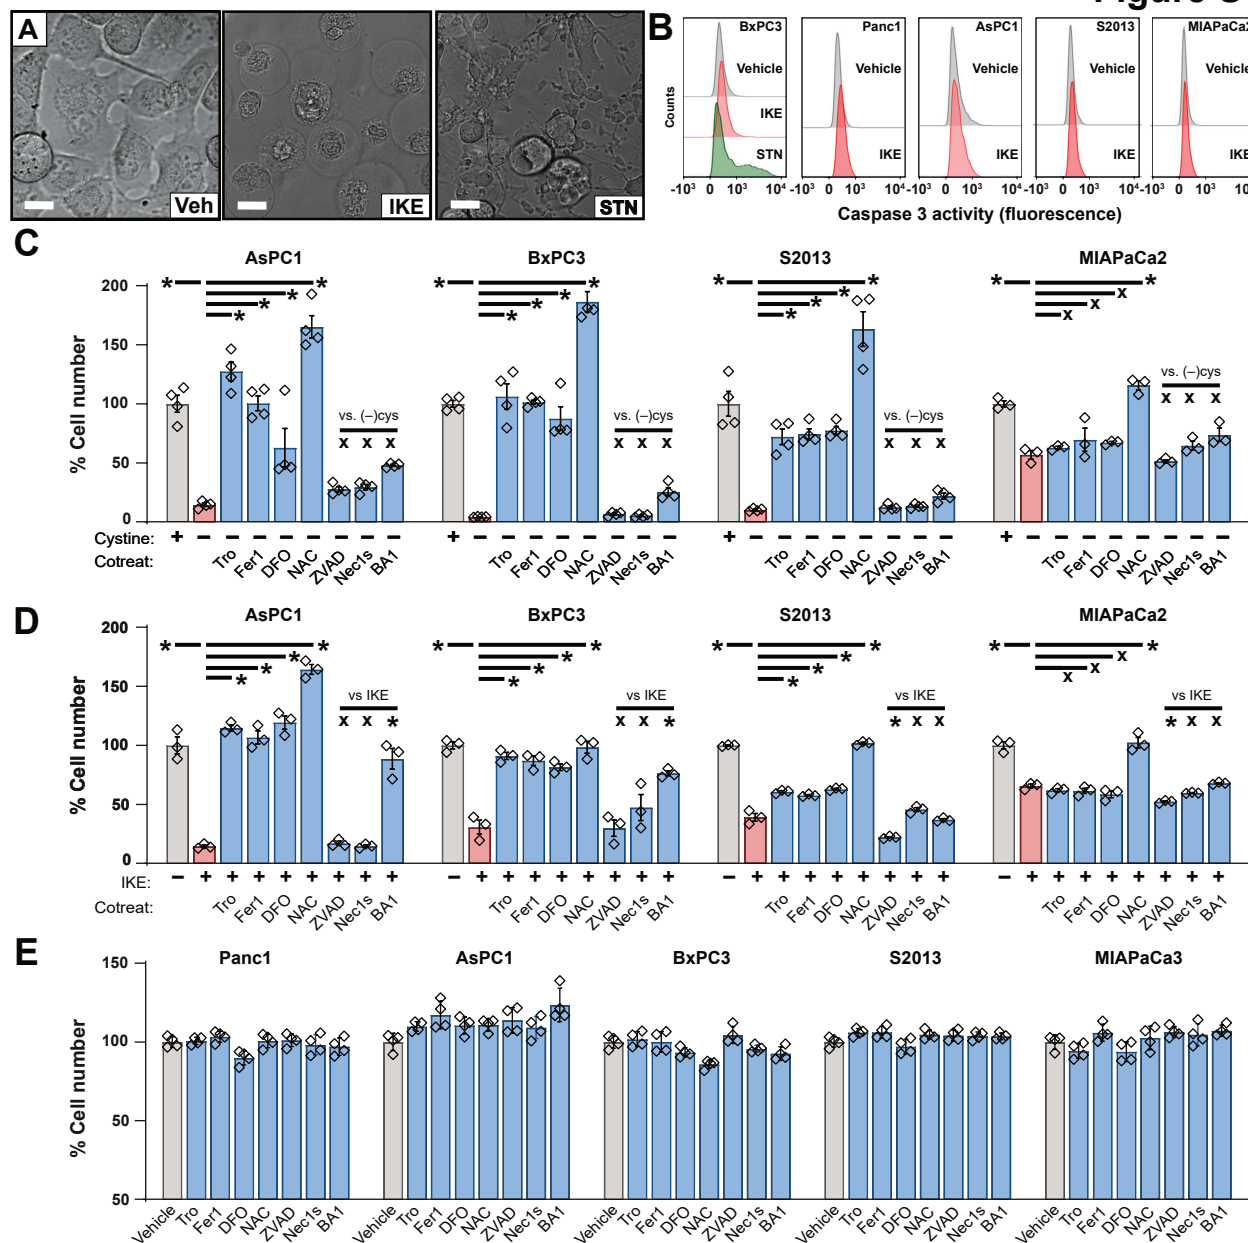

**Fig. S1. The mechanism of ferroptosis in PDA cell lines** (A) High magnification image of PANC-1 cells cultured in the presence of vehicle (0.1% DMSO), 5  $\mu$ M IKE or 0.2  $\mu$ M staurosporine (STN), a known inducer of apoptosis, after 16 hours. Bar = 15  $\mu$ m. (B) Flow cytometric analysis of cleaved caspase 3 activation in cell lines stained with a FITC-based active caspase 3 antibody. Cells were treated with vehicle (0.1% DMSO, gray) and IKE (5  $\mu$ M, red). In BxPC-3 cells, staurosporine (STN) treatment is used as a positive control (0.2  $\mu$ M, green). (C) Cell viability of a panel of human pancreatic cancer cells cultured in vehicle (0.1% DMSO and 1mM HCl veh, shown in gray), the absence of cystine (no cys, shown in red), and in the absence of cystine but in the presence of 100  $\mu$ M Trolox (Tro, shown in blue), 500 nM ferrostatin-1 (Fer-1, ferroptosis inhibitor), 100  $\mu$ M deferoxamine (DFO, iron chelator), 1 mM NAC (NAC), 50  $\mu$ M ZVAD-FMK (ZVAD, apoptosis inhibitor), 1 nM bafilomycin A1 (BA1, autophagy inhibitor), and 10  $\mu$ M Necrostatin 1s (Nec1s, necroptosis inhibitor). Viability was assessed after 24 hours of treatment. Error equals  $\pm$  SEM. n = 3 biological replicates. \* = p < 0.05 with Tukey's test. x = no statistically significant difference. (D) Cell viability of a panel of human pancreatic cancer cells cultured in vehicle (0.2% DMSO, veh), 5  $\mu$ M IKE, and the aforementioned compounds and the concentrations indicated in Fig. S1C. Viability was assessed at 24 hours after treatment. Error equals  $\pm$  SEM. n = 3 biological replicates. \* = p < 0.05 with Tukey's test. x = no statistically significant difference. (E) Single treatment controls for all experiments shown in Fig. 1C, D; Fig. S1C, S1D.
