# Supplementary material
Source: PubMed Central journal article supplement (PMC7681911)
Supplement: NIHMS1643619-supplement-Figure_S2.pdf [file NIHMS1643619-supplement-Figure_S2.pdf]

**Figure S2**

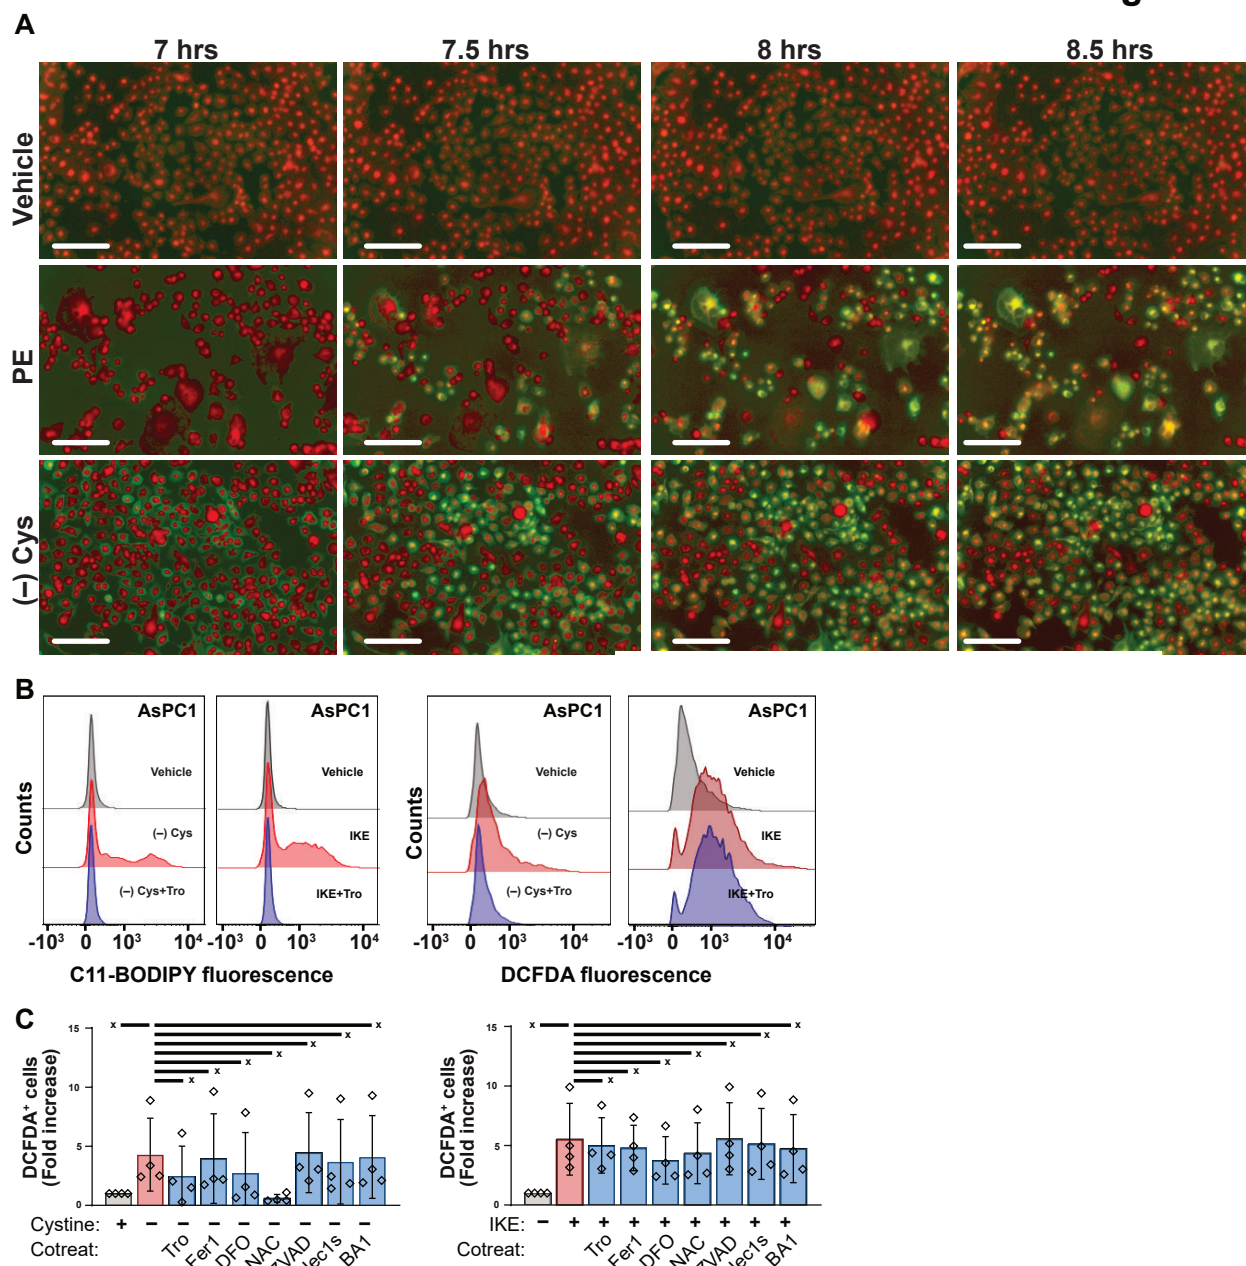

**Fig. S2. Lipid oxidation in PDA cell lines following cysteine depletion. (A)** Time-lapse fluorescent images of PANC-1 cells cultured in indicated conditions for indicated times. - cys indicates no cysteine present in extracellular media. PE was present at 1  $\mu$ M. Here, vehicle is 0.01% DMSO. Cells are stained with C-11 BODIPY, a lipid ROS indicator. Green staining highlights oxidized lipids and red staining shows reduced lipids. White bars indicate scale of 300  $\mu$ m. **(B)** Flow cytometric analysis of AsPC-1 cells stained with C11-BODIPY, a marker of lipid oxidation; or H2-DCFDA, a marker of general oxidative stress, after 6-8 hours of treatment with vehicle or no cysteine (left panel) or 5  $\mu$ M IKE (right panel), alone or in combination with 100  $\mu$ M Trolox. **(C)** Quantification of flow cytometric analysis of PDAC cells stained with general oxidation sensor when treated with indicated conditions (cysteine depletion carried out for 8 hours, IKE treatment carried out for 6 hours). Data represented as fold change in number of positive cells, with error =  $\pm$  SD, with n = 4 independent cell lines tested in triplicate. x = no significant difference by Tukey's test.
