# Supplementary material
Source: PubMed Central journal article supplement (PMC7681911)
Supplement: NIHMS1643619-supplement-Figure_S4.pdf [file NIHMS1643619-supplement-Figure_S4.pdf]

**Figure S4**



**Fig. S4. Expression and protein interactions of *SLC7A11*** (A) Laser-captured, microdissected (LCM) RNA-Seq from matched human PDAC epithelium and stroma shows enrichment of expression in epithelial tissue (distribution shown in red) when compared to neighboring stromal tissue, which is not malignant (distribution shown in blue). (B) Normalized expression of *SLC7A11* across 31 tumor types from TCGA data showing high overall expression in pancreatic ductal adenocarcinoma (PAAD, blue), with generally low variance. (C) Analysis of *SLC7A11* mRNA expression in TCGA data sets of tumors for which at least 6 normal samples were available shows overexpression of *SLC7A11* in most tumor types. (D) In TCGA tumors for which there is a difference in outcome between patients expressing varying levels of *SLC7A11*, high levels are consistently associated with a worse prognosis (logrank test p-values indicated, survival curves shown in red). Abbreviations used according to standard TCGA nomenclature.
