# Supplementary material
Source: PubMed Central journal article supplement (PMC7681911)
Supplement: NIHMS1643619-supplement-Figure_S5.pdf [file NIHMS1643619-supplement-Figure_S5.pdf]

**Fig. S5. Pdx1-FlpO allele design and validation.** (A) Design of the *Pdx1-FlpO* allele (B and C) *Pdx1-FlpO* founders were crossed to alkaline phosphatase Flp reporter mice (gift, Dr. Susan Dymecki, Harvard University) to visualize recombination in the pancreas. Frozen sections of pancreata from *Rosa26<sup>hpAP/+</sup>* (B, negative control) or *Pdx1-FlpO*; *Rosa26<sup>hpAP/+</sup>* (C). Mice were stained for alkaline phosphatase activity (dark blue). Founder lines exhibiting prominent alkaline phosphatase activity in the pancreas were used in further breeding. Bars = 200  $\mu$ m. (D and E) The *Pdx1-FlpO* strain was crossed with additional strains to generate *Kras*<sup>LSL.G12D/+</sup>; *p53*<sup>R172H/+</sup>; *Pdx1-FlpO*<sup>tg/+</sup>; *Slc7a11*<sup>Fl/Fl</sup> (KPFS) mice. Histopathological examination of the pancreas of young KPFS mice revealed the spontaneous formation of both acinar-to-ductal metaplasia (ADM indicated with arrow, panel D) and pancreatic intraepithelial neoplasia (PanIN indicated with arrow, panel E), both precursors to tumor development. Bar = 50  $\mu$ m. (F) Table indicating effective genotypes of tissues in the KPFSR mouse.
