# Supplementary material
Source: PubMed Central journal article supplement (PMC7681911)
Supplement: NIHMS1643619-supplement-Figure_S7.pdf [file NIHMS1643619-supplement-Figure_S7.pdf]

Figure S7



**Fig. S7. Ultrasound, recombination, and histopathology of KPFSR tumors.** (A) Ultrasounds from a tamoxifen-treated KPFSR mouse that underwent complete regression, on study days -1, 13, and 41 of treatment. Hashed yellow lines indicates tumor. Scale bar = 2 mm. (B) PCR analysis of recombination in endpoint tumors from randomized survival study. Results indicate > 60% recombination of Slc7a11 in endpoint samples (See Fig S6). (C) Western blot of Slc7a11 in endpoint tumor samples show limited changes in protein levels in control or tamoxifen treated groups. Controls are wildtype (WT) mouse embryonic fibroblasts (MEFs) and knockout (KO) MEFs generated from our conditional Slc7a11 allele. (D) High magnification image of ferroptotic lesion, containing megamitochondria (M) and cytoplasmic vacuolization (V). Scale bar = 10  $\mu$ m.
