# Supplementary material
Source: PubMed Central journal article supplement (PMC7681911)
Supplement: NIHMS1643619-supplement-Figure_S8.pdf [file NIHMS1643619-supplement-Figure_S8.pdf]

Figure S8

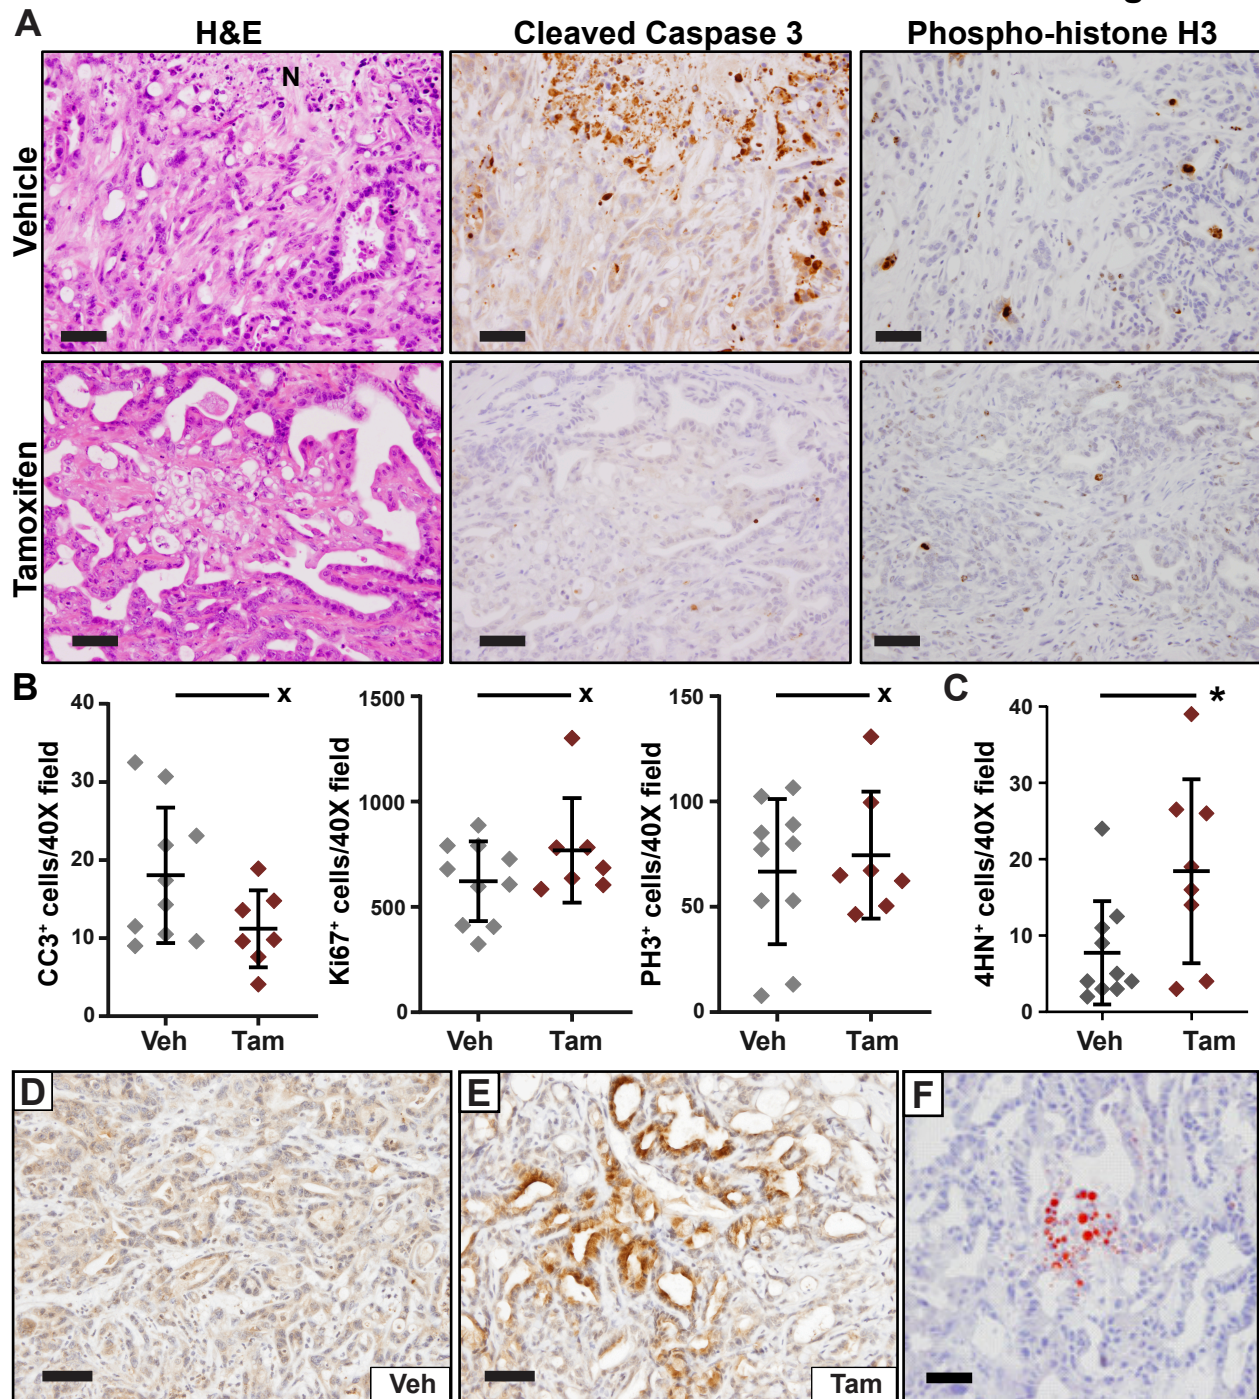

**Fig. S8. Histopathological and immunohistochemical analyses of lesions in tamoxifen-treated KPFSR tumors.** (A) H&E, cleaved caspase 3 (CC3), and phospho-histone H3 (PH3) staining of KPFSR tumors from vehicle and tamoxifen treated mice. Tamoxifen treated sample shows an example of tissue damaged from Slc7a11 deletion. This region appears CC3 negative but does not exhibit notable changes in PH3 staining. Scale bar indicates 50  $\mu$ m. (B and C) Quantification of CC3, Ki67, PH3, and 4-hydroxynonenal (4HN) staining from both treatment groups. Data are mean  $\pm$  SD. No statistically significant changes are detected by Student's t-test when comparing vehicle and tamoxifen groups for any stain save 4HN (C) where \*  $p < 0.05$ . (D and E) Images of 4HN stained tumors showing the enrichment of 4HN lesions in samples from tamoxifen treated mice. Scale = 50  $\mu$ m. (F) Oil Red O staining of tamoxifen treated tumors showing lipid droplets (in red) of large size. Scale bar is 50  $\mu$ m.
