# Supplementary material
Source: PubMed Central journal article supplement (PMC7681911)
Supplement: NIHMS1643619-supplement-Figure_S9.pdf [file NIHMS1643619-supplement-Figure_S9.pdf]

**Figure S9**

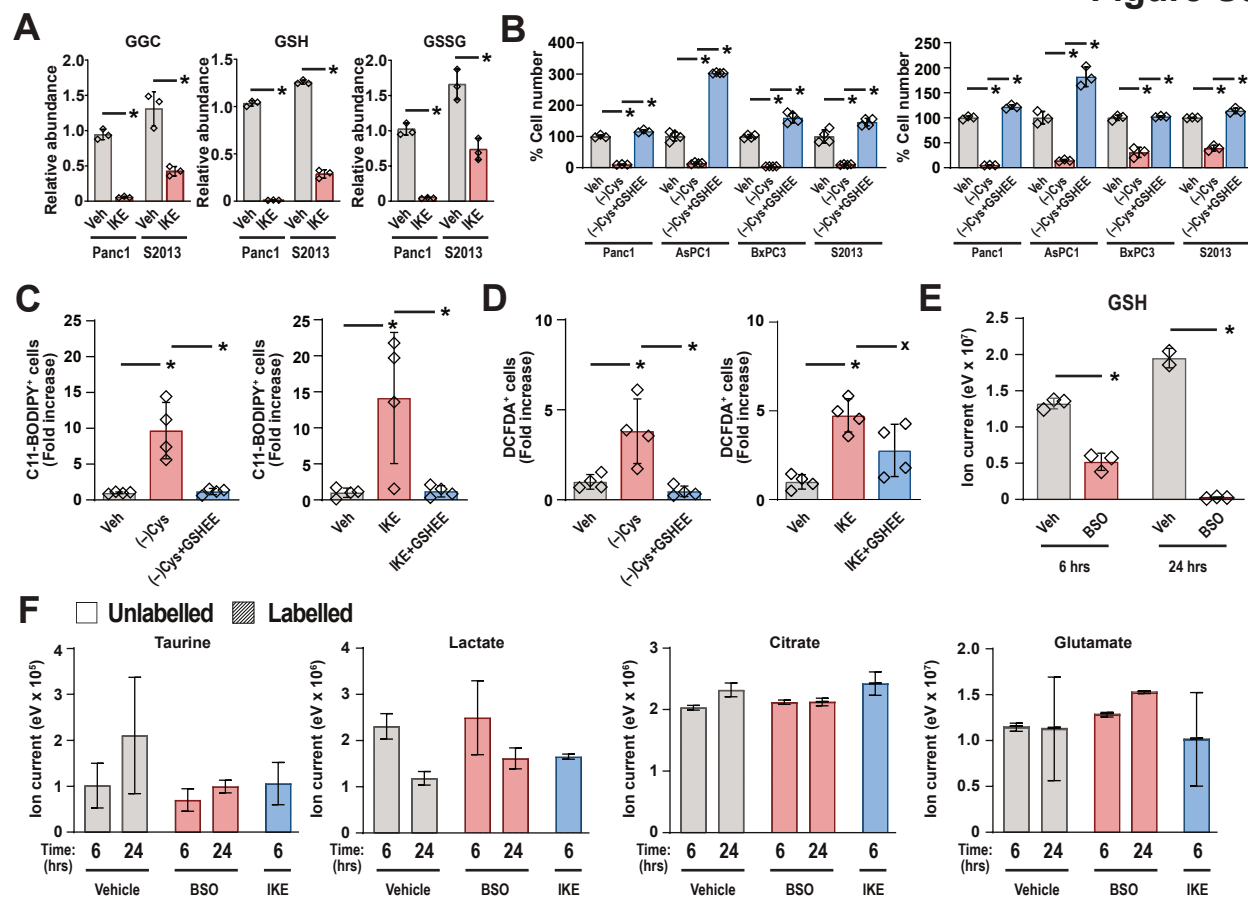

**Fig. S9. Metabolomics analysis of cysteine utilization and rescue of cell death by cell permeable GSH.** (A) Measurement of gamma glutamyl cysteine (gGC), GSH, and GSSG in two sensitive cell lines treated with 0.1% DMSO (Veh) or 5  $\mu$ M IKE for six hours. Data are mean  $\pm$  SD with  $n = 3$  biological replicates. \*  $p < 0.05$ , Student's t-test. (B) GSH-EE rescue of cystine withdrawal and system  $x_c^-$  inhibition in sensitive cell lines. Data are mean  $\pm$  SEM with  $n = 3$  independent experiments. \*  $p < 0.05$  by Tukey's test. (C and D) Flow cytometric analyses of sensitive cell lines grown without cystine (-cys) or with 5  $\mu$ M IKE and in the presence of GSH-EE for 6-8 hours. Cells were stained with C-11 BODIPY and DCFDA to mark lipid oxidative stress and general oxidative stress, respectively. Data are means  $\pm$  SD with  $n = 4$  independent cell lines tested in triplicate. \*  $p < 0.05$  by Tukey's test. x = not significant. (E) GSH levels as measured by mass spectrometry in PANC-1 cells treated with vehicle or 600  $\mu$ M BSO for listed timepoints. Data are means  $\pm$  SD with  $n =$  at least 2 biological replicates. \*  $p < 0.05$  by Student's t test. (F) Measurement of labeled and unlabeled levels of taurine, lactate, glutamate, and citrate in PANC-1 treated with vehicle (0.05% DMSO), 5  $\mu$ M IKE, or 600  $\mu$ M BSO for indicated times. (All comparisons not significant by Tukey's test). No labeled species for these metabolites were detected.
