# Supplementary material
Source: PubMed Central journal article supplement (PMC7681911)
Supplement: NIHMS1643619-supplement-Figure_S10.pdf [file NIHMS1643619-supplement-Figure_S10.pdf]

Figure S10

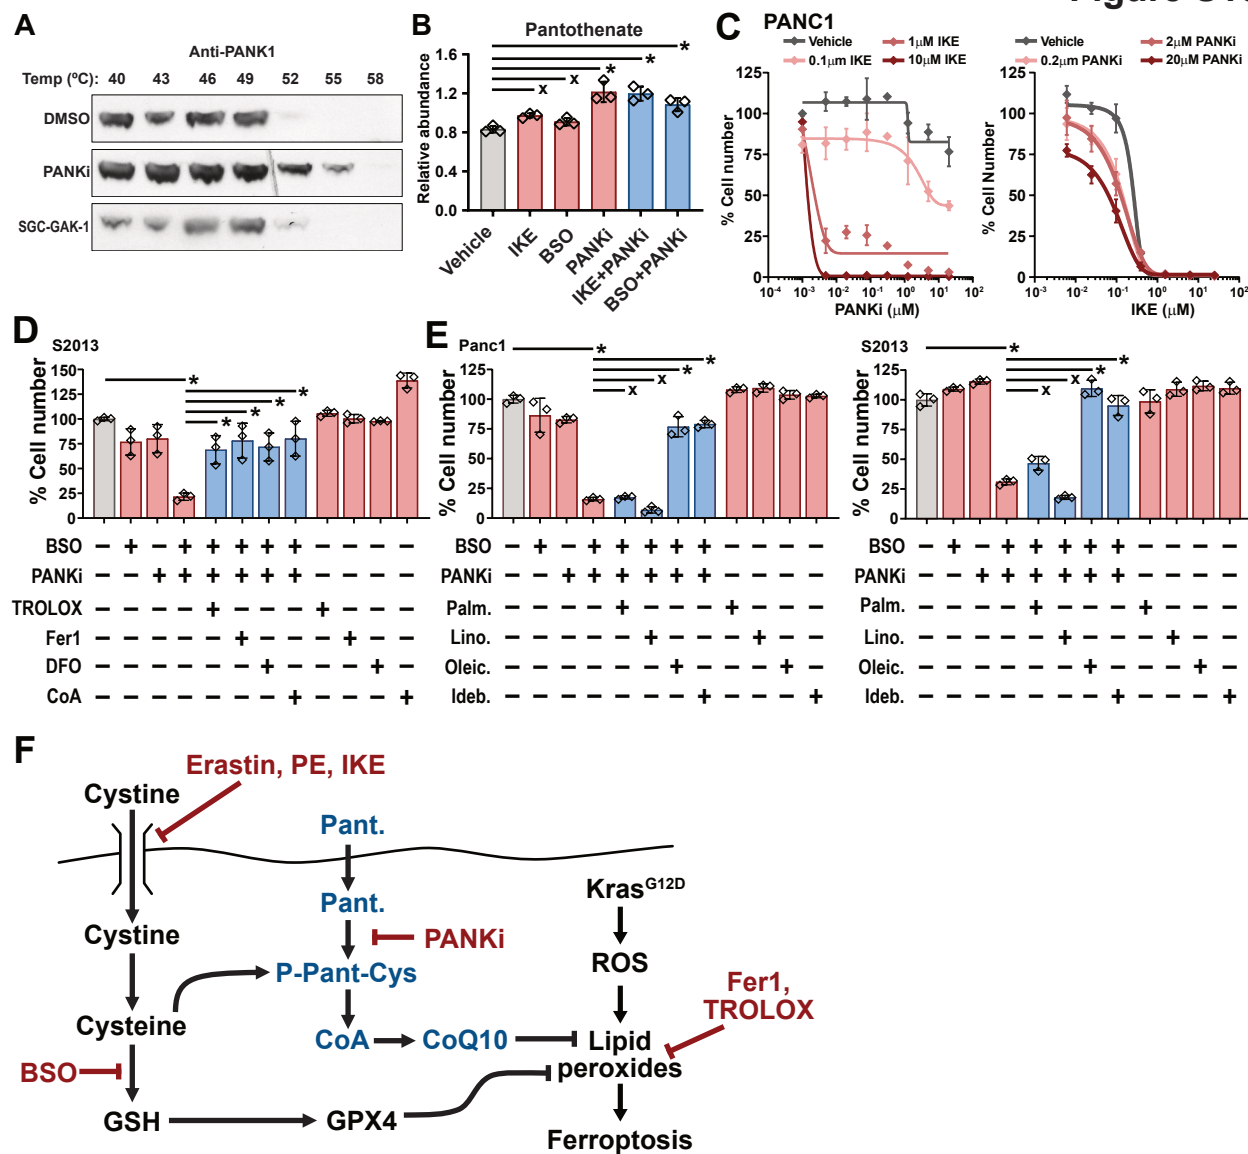

**Fig. S10. GSH and Coenzyme A synthesis in ferroptosis** (A) Cell based thermal shift assay confirms binding of PANK1 inhibitor to target. (B) Mass spectrometry measurements of pantothenic acid in given treatment conditions: vehicle (0.1% DMSO), IKE (5  $\mu$ M), BSO (75  $\mu$ M), PANKi (5  $\mu$ M), and various combinations. (C) Dose response curves of PANKi in combination with different concentrations of IKE and the inverse experiment. (D) Treatment of S-2013 PDAC cell line with combinations of BSO, PANKi, and ferroptosis rescue agents. (E) Treatment of PANC-1 and S-2013 PDAC cells with combinations of BSO, PANKi, palmitic acid (a saturated fatty acid), linoleic acid (a poly-unsaturated fatty acid), oleic acid (a mono-unsaturated fatty acid) and idebenone. (F) Model of the roles of cysteine utilization in suppressing ferroptosis. All data are means  $\pm$  SEM of three independent experiments. \*p < 0.05 by Tukey's test. x = not significant.
