# Supplementary material
Source: PubMed Central journal article supplement (PMC7681911)
Supplement: NIHMS1643619-supplement-Figure_S11.pdf [file NIHMS1643619-supplement-Figure_S11.pdf]

**Figure S11**

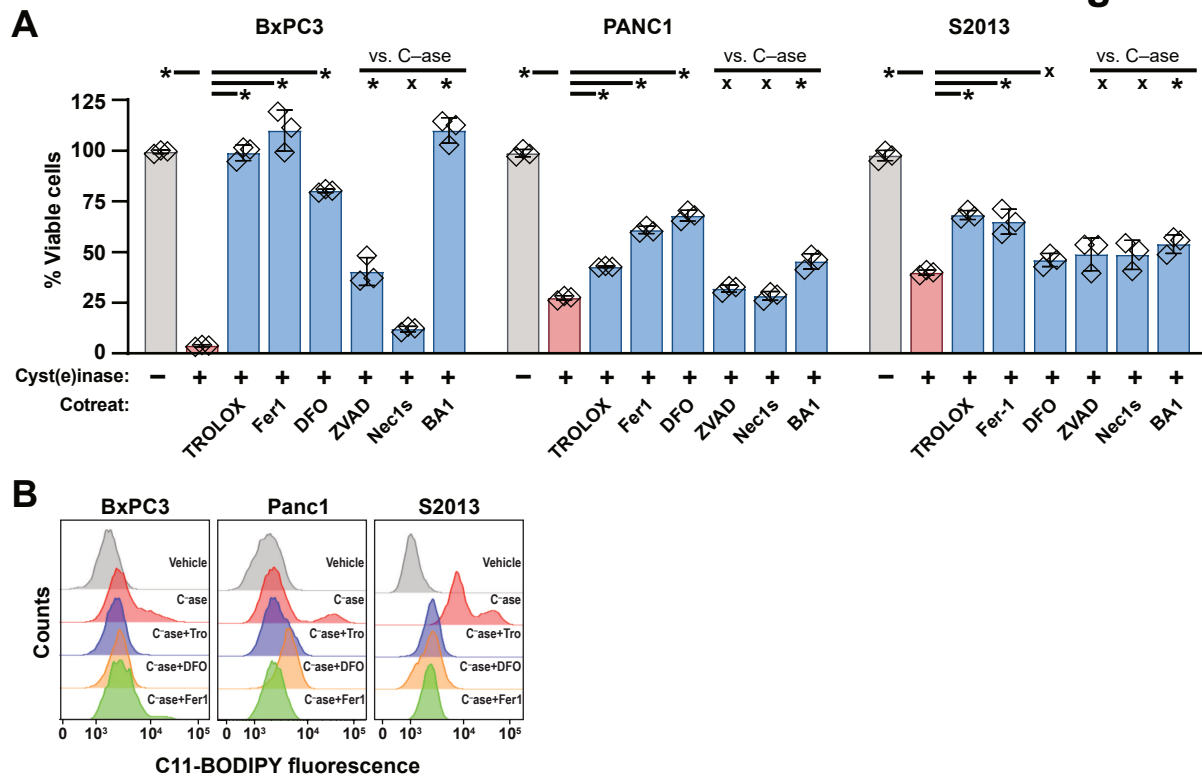

**Fig. S11. Cysteinase *in vitro* studies. (A)** Viability of human PDAC cells treated with cyst(e)inase, alone or in combination with Trolox, Fer1, DFO, ZVAD-FMK, Necrostatin-1S, or Bafilomycin A (see Fig. 1C for details on compounds). Data are mean  $\pm$ SEM with  $n = 3$  independent experiments. \*  $p < 0.05$  by Tukey's test. x = not significant. **(B)** C11-BODIPY fluorescence for human PDAC cells treated with cyst(e)inase alone or in combination with Trolox, DFO, or Fer-1.
