# Supplementary material
Source: PubMed Central journal article supplement (PMC7681911)
Supplement: NIHMS1643619-supplement-Figure_S12.pdf [file NIHMS1643619-supplement-Figure_S12.pdf]

**Figure S12**



**Fig. S12. Histopathology of cyst(e)inase treated KPC pancreatic tumors.** (A-F) H&E stained microscopic images of pancreatic tumor tissues treated from KPC mice treated with cyst(e)inase. Arrowheads show lipid droplets. Images of well (A) and poorly (B) differentiated PDAC treated with cyst(e)inase and exhibiting lipid droplet formation. Bars = 20  $\mu$ m. (C) Focal lesion (hashed line) exhibiting large numbers of lipid droplets. Bar = 50  $\mu$ m. (D) In some cyst(e)inase tumors, decompressed blood vessels (arrows) were noted. Bar = 100  $\mu$ m. (E) Regional necrosis (hashed line) of varying degrees was noted in all cyst(e)inase treated KPC tumors. (Bar = 2 mm). (F) Quantification of necrotic regions in various treatment samples. \* $p < 0.05$  by unpaired Student's t-test. (G) TEM of KPC pancreatic tumor from cyst(e)inase treated mouse showing a larger lipid droplet (LD). Scale = 2  $\mu$ m.
