# Supplementary material
Source: PubMed Central journal article supplement (PMC7681911)
Supplement: NIHMS1643619-supplement-Figure_S13.pdf [file NIHMS1643619-supplement-Figure_S13.pdf]

**Figure S13**

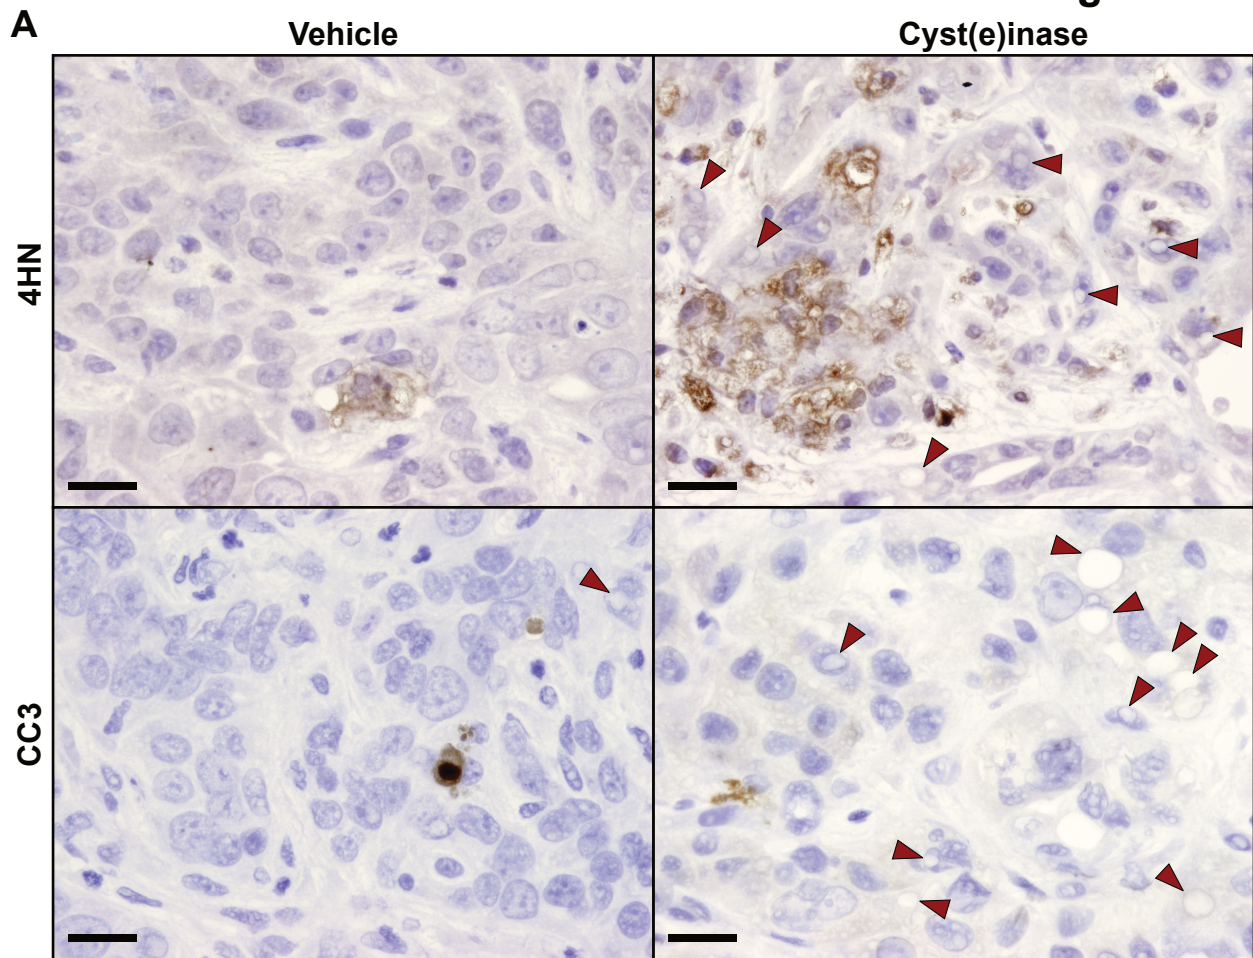

**Fig. S13. Response of KPC tumors to cyst(e)inase.** (A) Immunohistochemistry for 4-hydroxynonenal and cleaved caspase 3 from representative KPC pancreatic tumors treated with vehicle or cyst(e)inase in the 10-day short term response study. Red arrows indicate lipid droplets.
